# Supplementary material for: Immortalisation of primary human alveolar epithelial lung cells using a non-viral vector to study respiratory bioreactivity in vitro
Source: PubMed Central journal article supplement (PMC7686381; doi:10.1038/s41598-020-77191-y), 2020-11-24
Supplement: 41598_2020_77191_MOESM1_ESM.pdf [file 41598_2020_77191_MOESM1_ESM.pdf]

1 **Immortalisation of primary human alveolar epithelial lung cells using a non-viral vector to study respiratory bioreactivity *in vitro***

2

3

4 Alberto Katsumiti<sup>1,2\*</sup>, Pakatip Ruenraroengsak<sup>3,4</sup>, Miren P. Cajaraville<sup>1</sup>, Andrew J. Thorley<sup>2,5</sup>, Teresa D. Tetley<sup>2\*</sup>

5

6

7

8

9

10

11

12

13

14

15

16 **Supplementary Information**

17

18 **Figure S1.** Hydrodynamic size measured by DLS of LF in Opti-MEM medium at 1:33, 1:16 and 1:8 (LF: Opti-MEM) (A-C) and of LF-DNA

19 nanomeric complexes at 1:1, 1:2 and 1:4 (LF:DNA) dilution ratios. n = 3 replicates per sample.

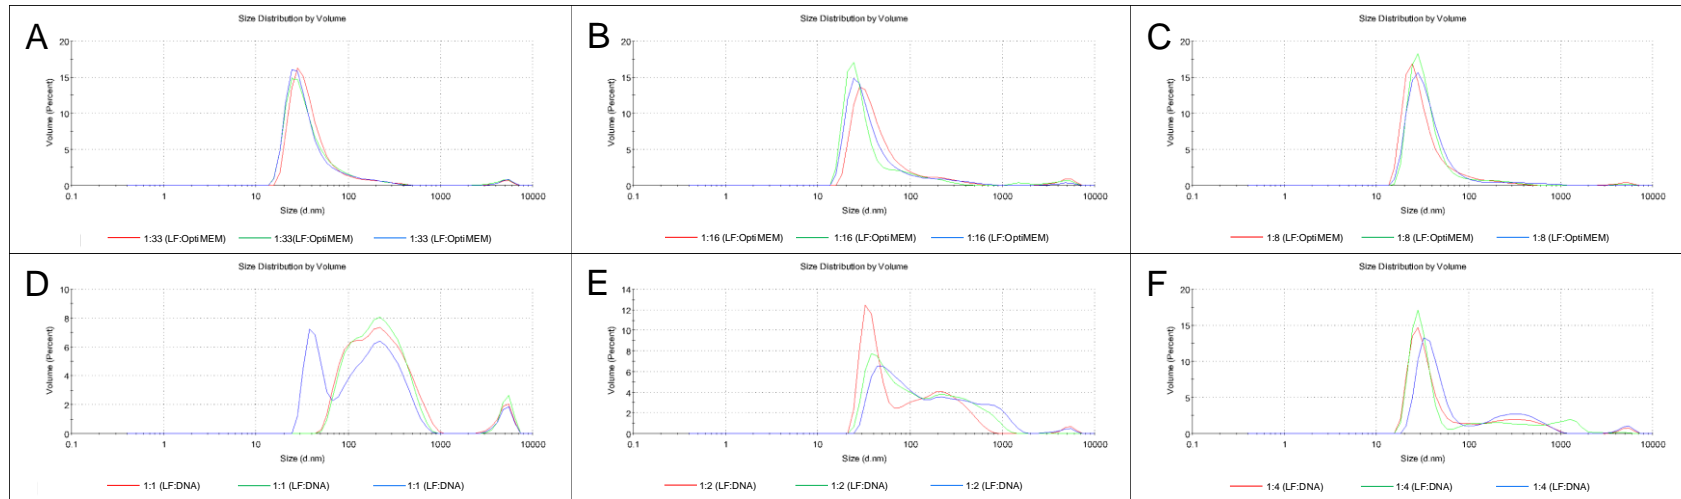

20

21

22 **Figure S2.** Full-length original and unprocessed immunoblots of RAGE, caveolin-1,  
23 podoplanin and SP-C in ICs, TT1 cell line and primary AT2 cells. Loading protein  
24 concentrations were adjusted to 50  $\mu$ g per sample.

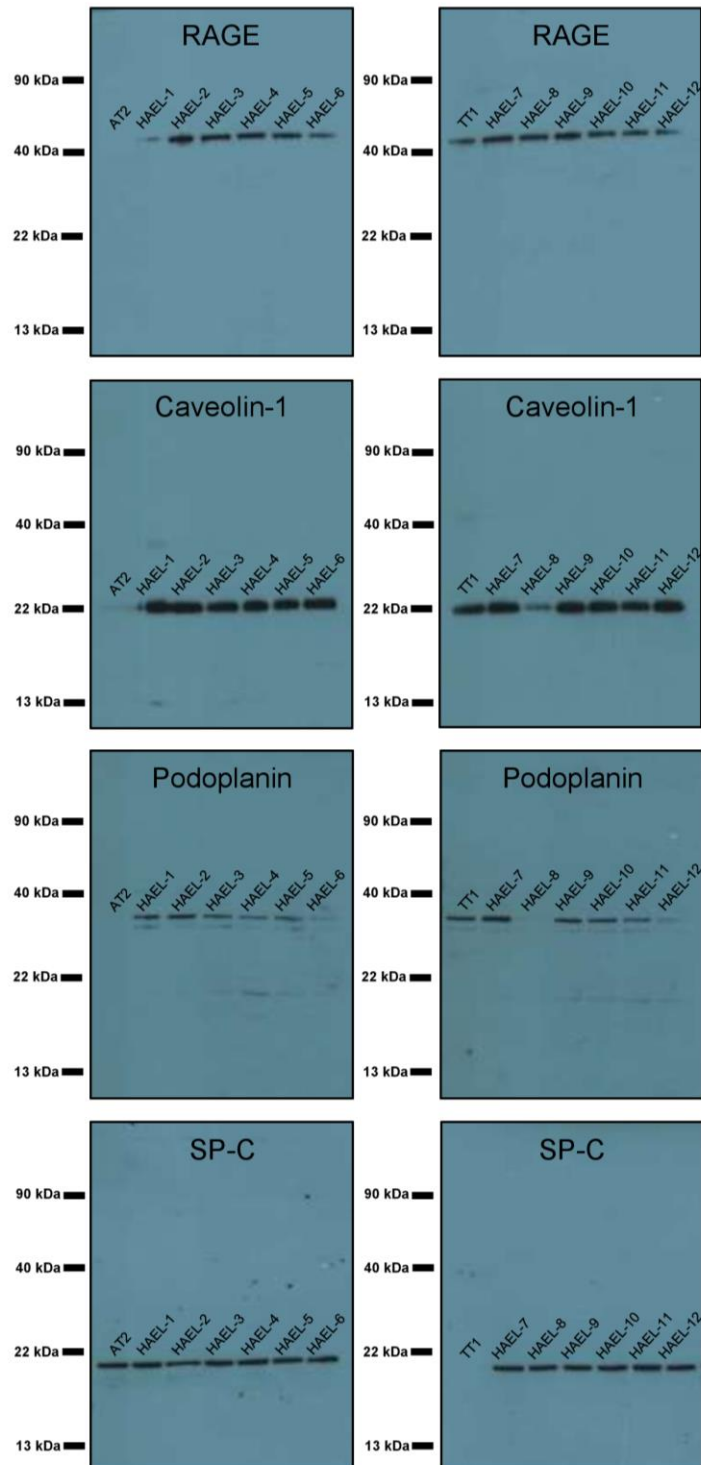

26 **Figure S3.** A cell showing structures resembling lamellar bodies (\*) but flattened AT1 morphology, thus showing both AT1 and AT2 characteristics,

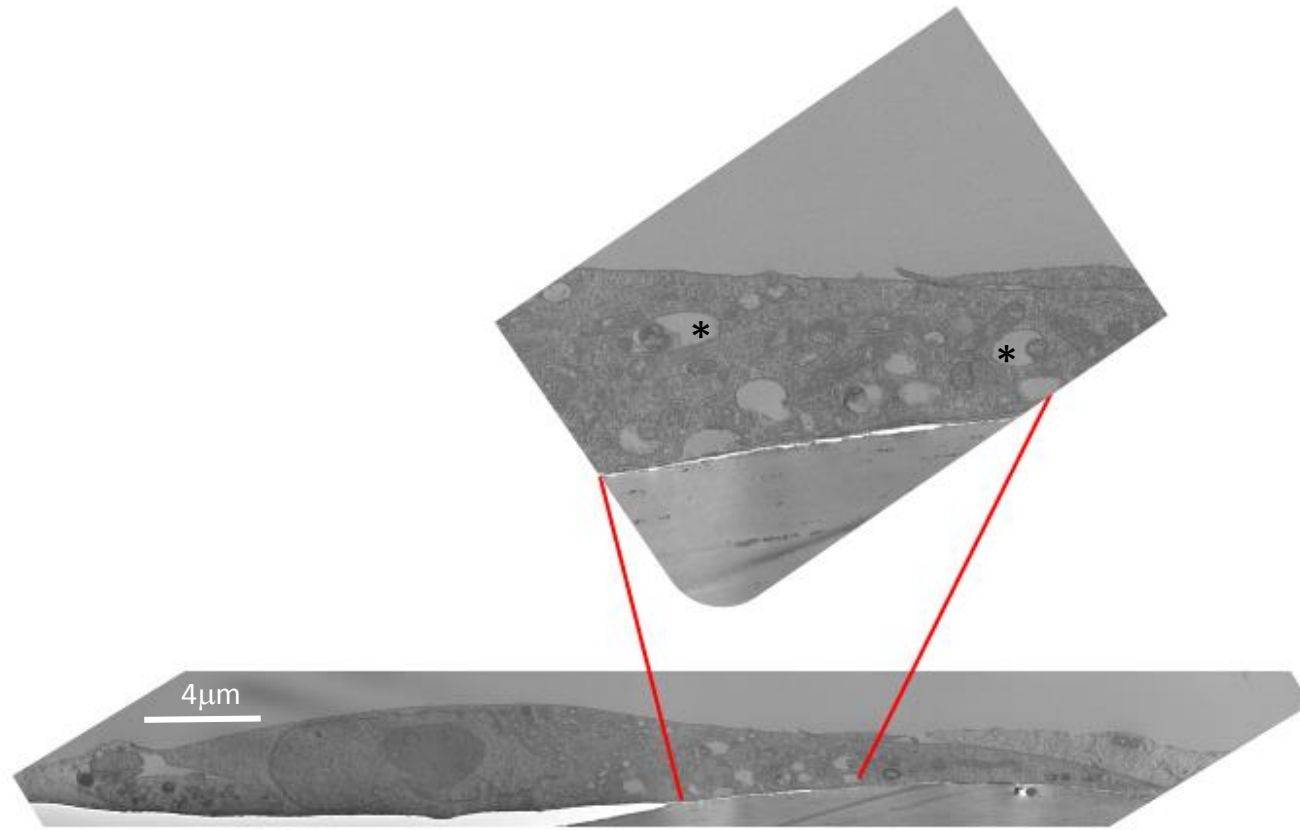

32 **Table S1.** Target genes and primer sequences used for the qPCR analysis and their respective functions in the lung tissue.

33

| Target gene | Gene name    | Gene ID | Accession number | Forward primer (5'-3') | Reverse primer (3'-5') | Function                            |
|-------------|--------------|---------|------------------|------------------------|------------------------|-------------------------------------|
| RAGE        | <i>AGER</i>  | 177     | NM_001136.4      | CTACCGAGTCCGTGTCTACC   | TTCTCATTAGGCACCAGGGG   | Inflammatory response               |
| Caveolin-1  | <i>CAVI</i>  | 857     | NM_001753.4      | CGTAGACTCGGAGGGACAT    | GTTGAGGTGTTTAGGGTCGC   | Transepithelial transport           |
| SP-C        | <i>SFTPC</i> | 6440    | NM_003018.3      | CCTGAGTGAGCACCTGGTTA   | TCAAGACTGGGGATGCTCTC   | Maintenance of alveolar homeostasis |

34

35

36

37

38

39

40

41

42

43

44 **Table S2.** Primary and secondary antibodies and their respective dilutions used for Western blot analysis.

45

|                   | <b>Primary antibody</b>                                                                         | <b>dilution factor</b> | <b>Secondary antibody</b>                   | <b>dilution factor</b> |
|-------------------|-------------------------------------------------------------------------------------------------|------------------------|---------------------------------------------|------------------------|
| <b>RAGE</b>       | Rabbit polyclonal anti-human receptor for advanced glycation endproducts (Abcam, Cambridge, UK) | 1:10,000               | Polyclonal goat anti-rabbit (Dako, Ely, UK) | 1:25,000               |
| <b>Caveolin-1</b> | Rabbit polyclonal anti-human caveolin-1 (Abcam, Cambridge, UK)                                  | 1:1,000                | Polyclonal goat anti-rabbit (Dako, Ely, UK) | 1:25,000               |
| <b>Podoplanin</b> | Mouse monoclonal anti-human podoplanin (Abcam, Cambridge, UK)                                   | 1:10,000               | Polyclonal goat anti-mouse (Dako, Ely, UK)  | 1:25,000               |
| <b>SP-C</b>       | Rabbit polyclonal anti-human prosurfactant protein C (Abcam, Cambridge, UK)                     | 1:10,000               | Polyclonal goat anti-rabbit (Dako, Ely, UK) | 1:25,000               |

46

47

48

49

50

51

52

53

54
